# Supplementary material
Source: PubMed Central journal article supplement (PMC5573156)

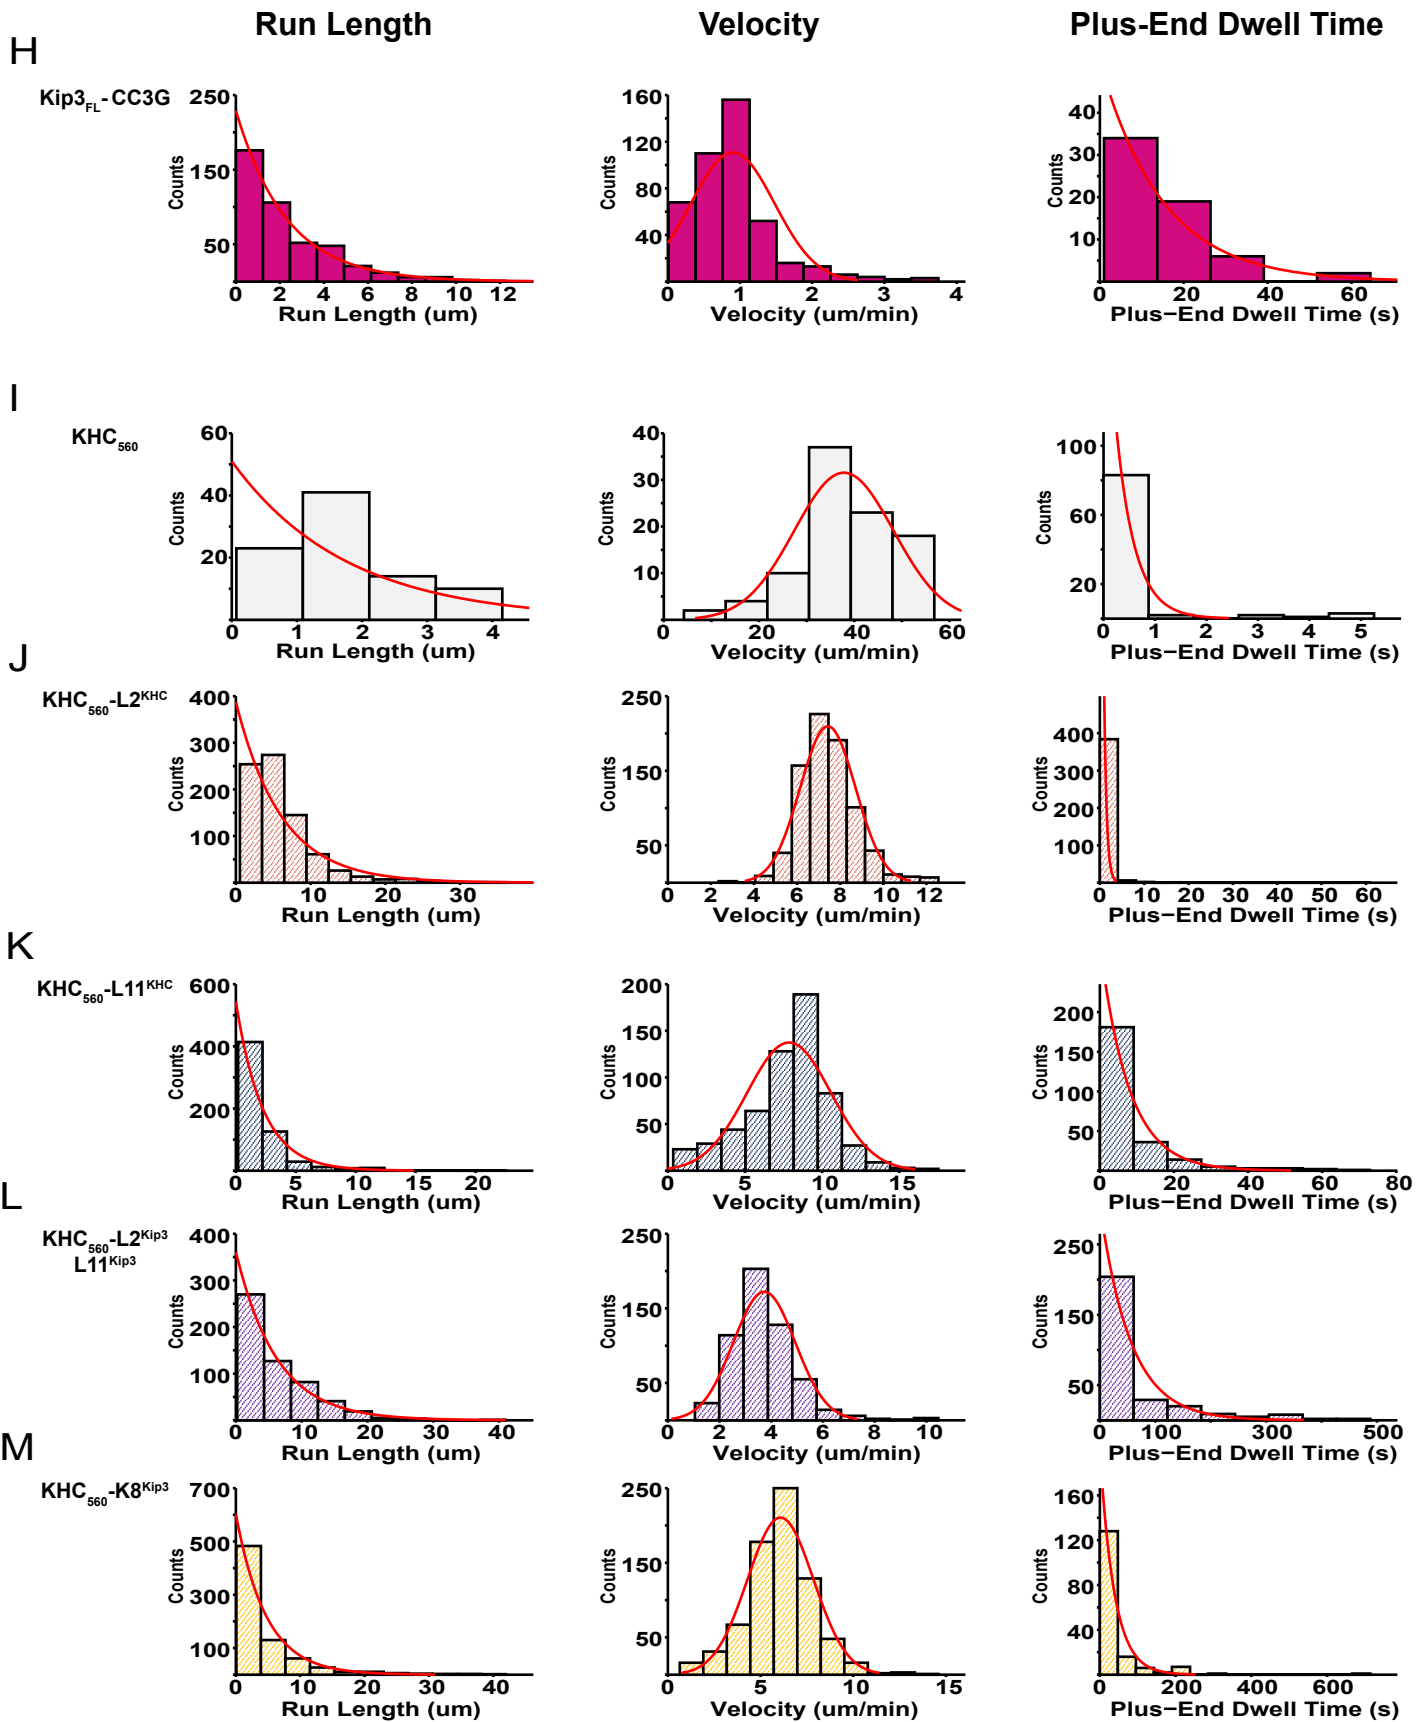

N

## Run Length

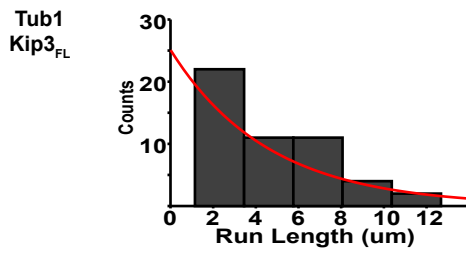

## Velocity

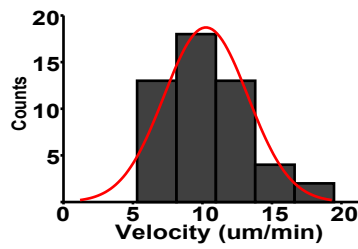

## Plus-End Dwell Time

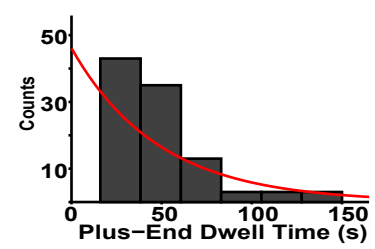

O

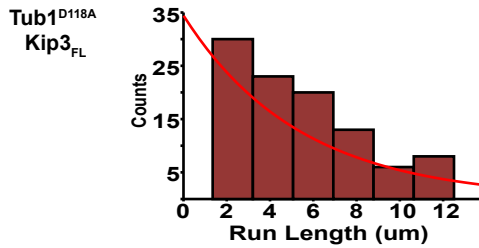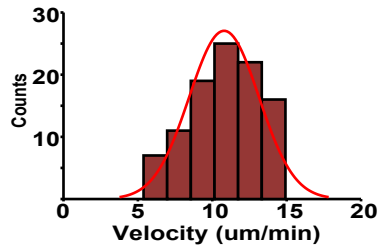

## Distributions of Depolymerization Rates

P

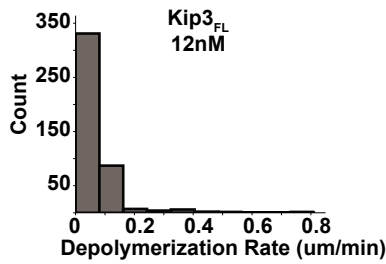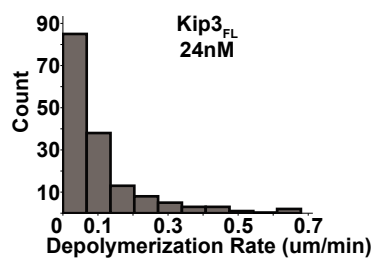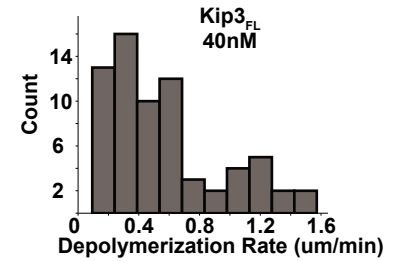

Q

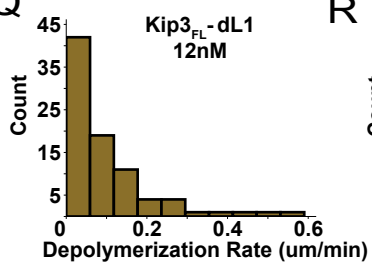

R

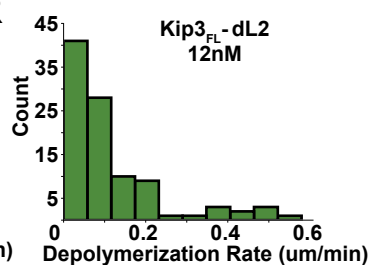

S

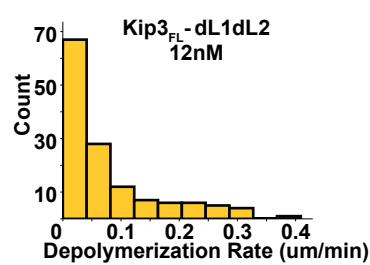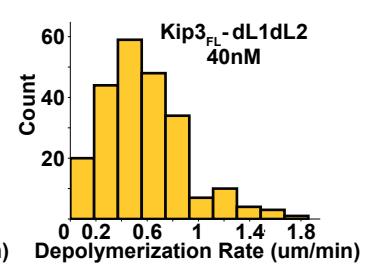

T

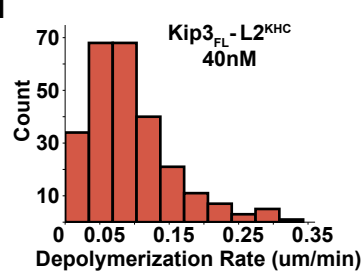

U

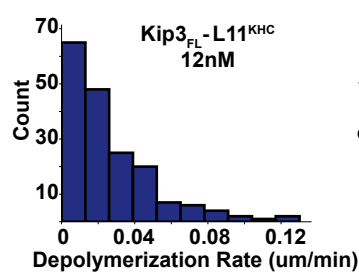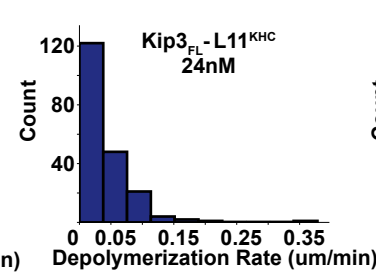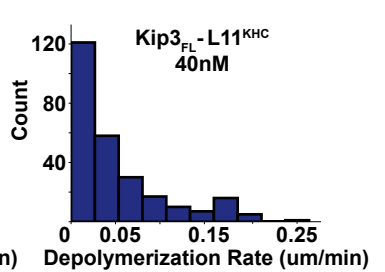

V

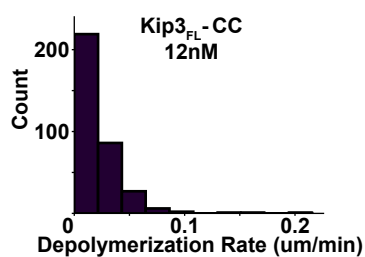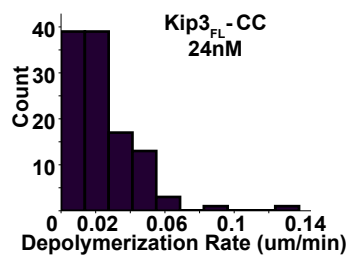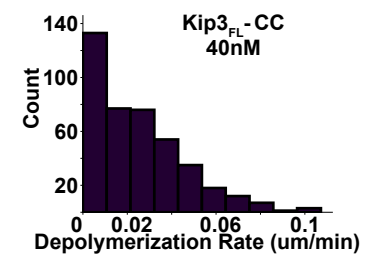

W

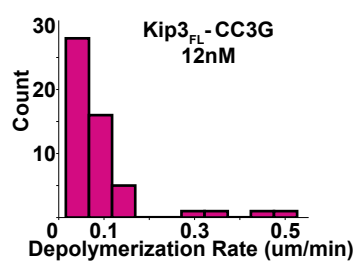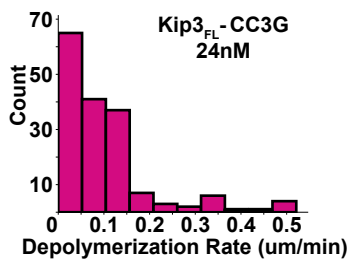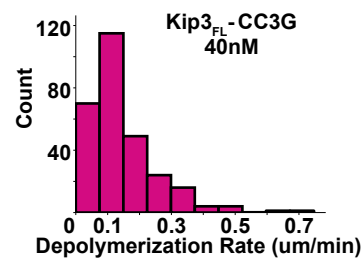

X

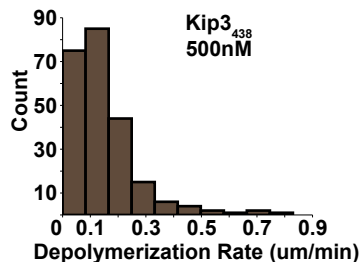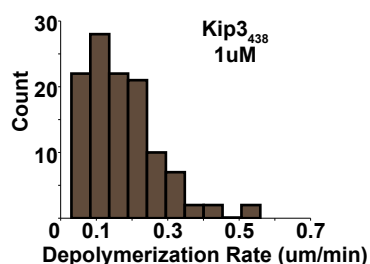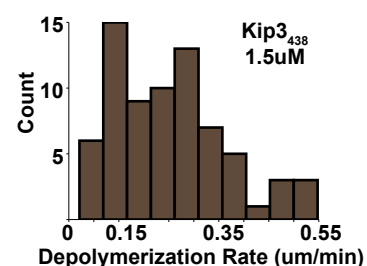

Y

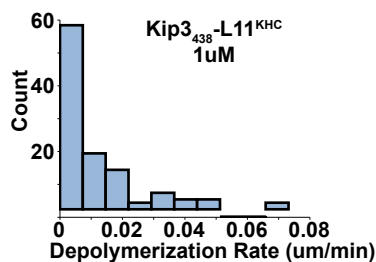

Z

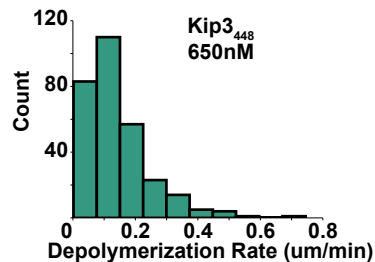

AA

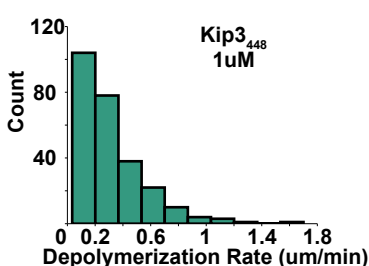

AB

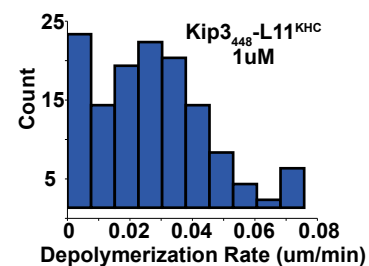

AC

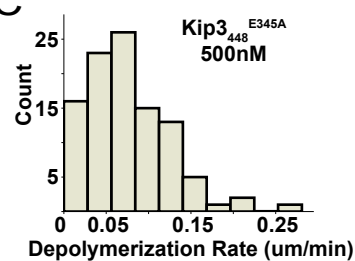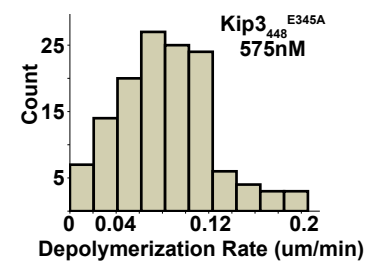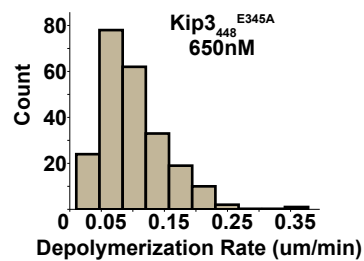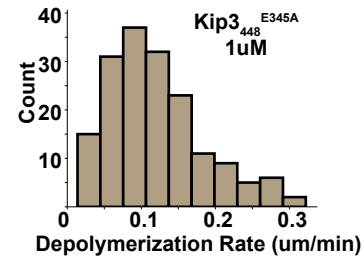

AD

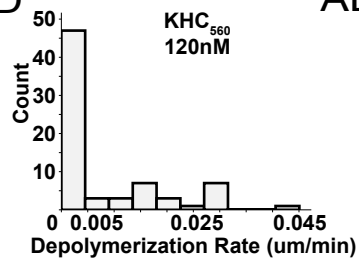

AE

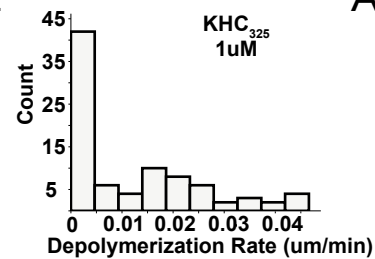

AF

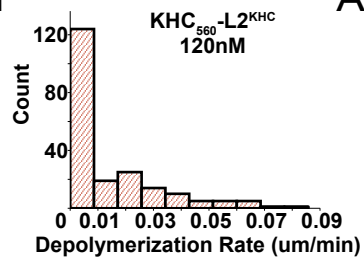

AG

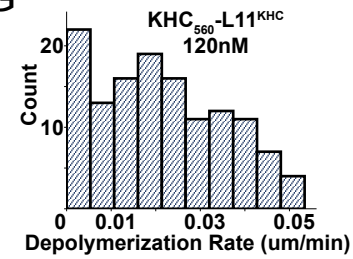

AH

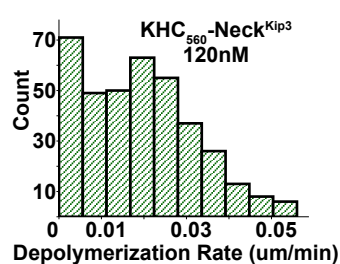

AI

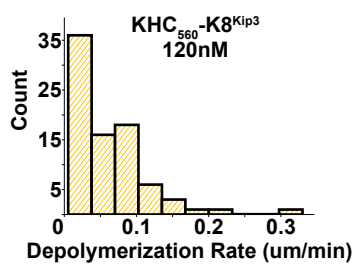

AJ

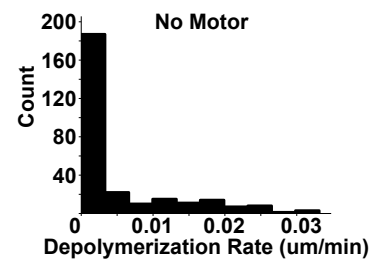

AK

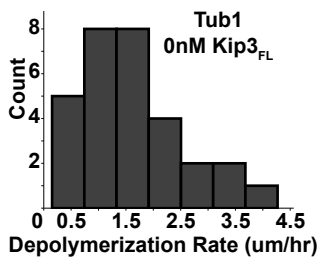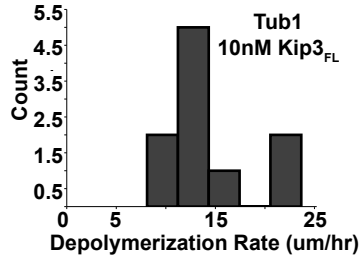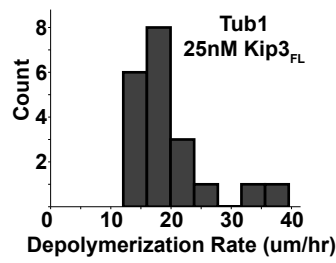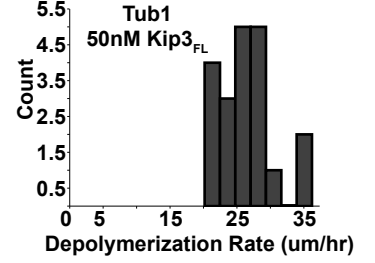

AL

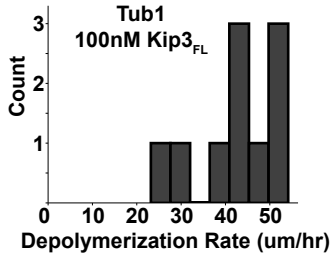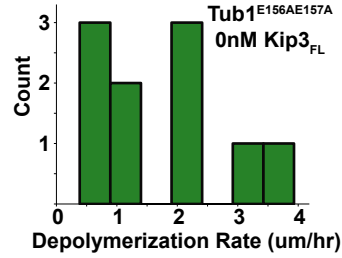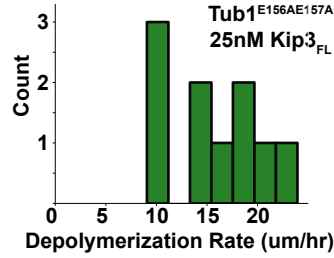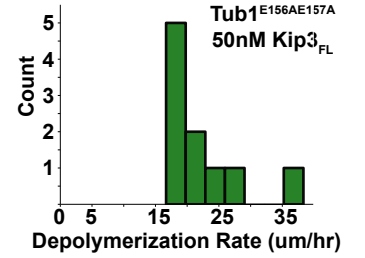

AM

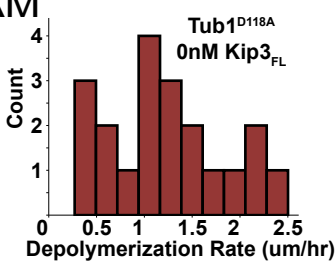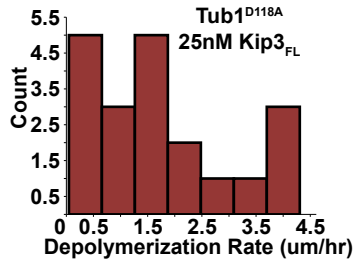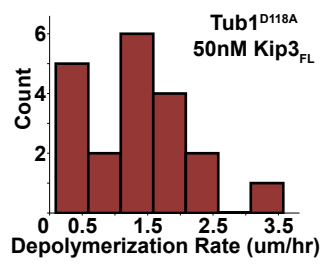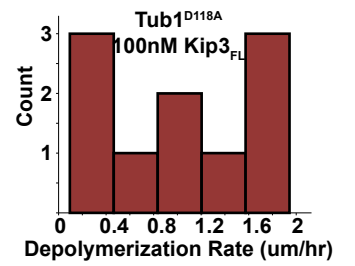

AN

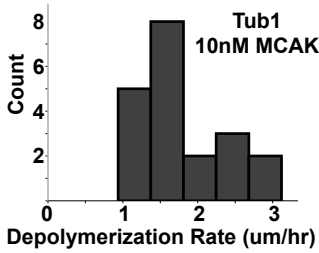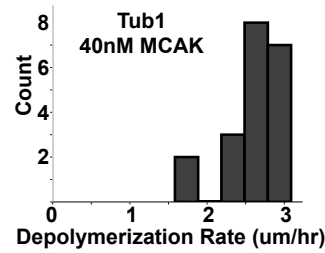

AO

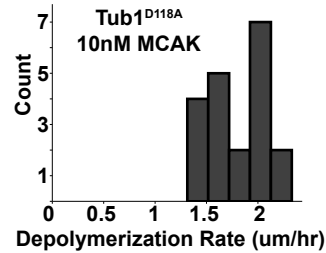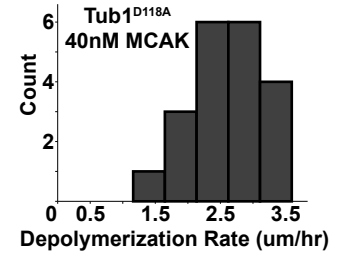

AP

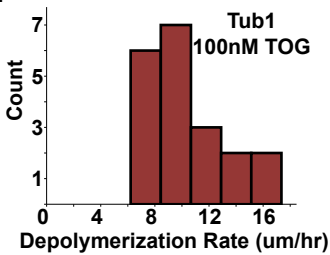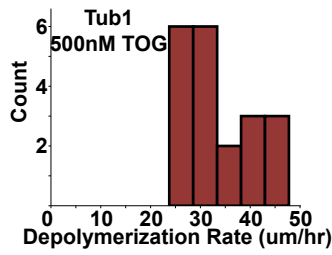

AQ

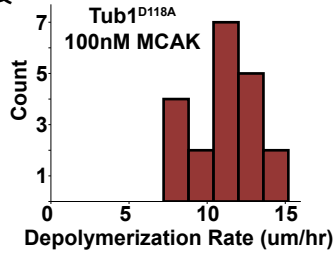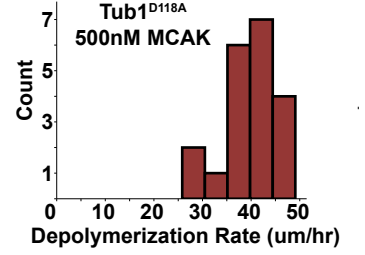

Supplement: NIHMS885317-supplement-2.pdf [file NIHMS885317-supplement-2.pdf]
